# Supplementary material for: Ketogenic diet-mediated steroid metabolism reprogramming improves the immune microenvironment and myelin growth of spinal cord injury rats through gene analysis and co-expression network analysis
Source: Research Square preprint supplement (doi:10.21203/rs.3.rs-53258/v2), 2020-10-20
Supplement: Supplementary file 1 [file 5ceaf625b87e3ef6d50f20d9.xls]

## Sheet: 模块成员统计表
module	number
blue	1221
brown	873
turquoise	1877
grey	716
yellow	263
green	213
